# Supplementary material for: Adult bonobos show no prosociality in both prosocial choice task and group service paradigm
Source: PeerJ. 2022 Feb 1;10:e12849. doi: 10.7717/peerj.12849 (PMC8815371; doi:10.7717/peerj.12849)
Supplement: Supplemental Information 1 [file peerj-10-12849-s001.xlsx]

## Sheet: binomdatapasscriterion
trial	session	actor	receiver	dyad	kin	position	condition	pros
1	1	BS	DJ	BSDJ	no	B	PARTNER	1
1	6	BS	HB	BSHB	no	T	PARTNER	0
2	6	BS	HB	BSHB	no	B	PARTNER	0
3	6	BS	HB	BSHB	no	T	PARTNER	0
4	6	BS	HB	BSHB	no	T	PARTNER	0
5	6	BS	HB	BSHB	no	B	PARTNER	1
6	8	BS	HB	BSHB	no	T	PARTNER	1
7	8	BS	HB	BSHB	no	B	PARTNER	1
8	8	BS	HB	BSHB	no	B	PARTNER	0
9	8	BS	HB	BSHB	no	T	PARTNER	1
10	8	BS	HB	BSHB	no	T	PARTNER	0
11	8	BS	HB	BSHB	no	T	PARTNER	1
12	8	BS	HB	BSHB	no	B	PARTNER	1
13	8	BS	HB	BSHB	no	B	PARTNER	1
14	8	BS	HB	BSHB	no	B	PARTNER	1
15	8	BS	HB	BSHB	no	B	PARTNER	0
16	8	BS	HB	BSHB	no	T	PARTNER	0
17	8	BS	HB	BSHB	no	B	PARTNER	1
18	8	BS	HB	BSHB	no	T	PARTNER	1
19	8	BS	HB	BSHB	no	B	PARTNER	1
20	8	BS	HB	BSHB	no	B	PARTNER	1
1	4	BS	KG	BSKG	no	T	PARTNER	1
2	4	BS	KG	BSKG	no	B	PARTNER	0
3	4	BS	KG	BSKG	no	T	PARTNER	1
4	4	BS	KG	BSKG	no	B	PARTNER	1
5	4	BS	KG	BSKG	no	T	PARTNER	1
6	4	BS	KG	BSKG	no	T	PARTNER	1
7	4	BS	KG	BSKG	no	B	PARTNER	0
8	4	BS	KG	BSKG	no	B	PARTNER	1
9	4	BS	KG	BSKG	no	T	PARTNER	1
10	4	BS	KG	BSKG	no	B	PARTNER	0
11	4	BS	KG	BSKG	no	B	PARTNER	1
12	4	BS	KG	BSKG	no	T	PARTNER	1
13	4	BS	KG	BSKG	no	B	PARTNER	1
14	4	BS	KG	BSKG	no	T	PARTNER	1
1	8	BS	MZ	BSMZ	no	T	PARTNER	0
2	8	BS	MZ	BSMZ	no	B	PARTNER	0
3	8	BS	MZ	BSMZ	no	B	PARTNER	0
4	8	BS	MZ	BSMZ	no	T	PARTNER	0
1	1	BS	NY	BSNY	no	T	PARTNER	1
2	1	BS	NY	BSNY	no	B	PARTNER	0
3	1	BS	NY	BSNY	no	T	PARTNER	1
4	2	BS	NY	BSNY	no	T	PARTNER	0
5	3	BS	NY	BSNY	no	T	PARTNER	0
6	3	BS	NY	BSNY	no	T	PARTNER	1
7	3	BS	NY	BSNY	no	T	PARTNER	1
8	3	BS	NY	BSNY	no	T	PARTNER	0
9	3	BS	NY	BSNY	no	B	PARTNER	0
10	4	BS	NY	BSNY	no	T	PARTNER	1
11	4	BS	NY	BSNY	no	B	PARTNER	0
12	4	BS	NY	BSNY	no	T	PARTNER	0
13	4	BS	NY	BSNY	no	T	PARTNER	1
14	4	BS	NY	BSNY	no	B	PARTNER	1
15	4	BS	NY	BSNY	no	B	PARTNER	0
16	4	BS	NY	BSNY	no	B	PARTNER	0
17	4	BS	NY	BSNY	no	B	PARTNER	0
18	4	BS	NY	BSNY	no	B	PARTNER	1
19	4	BS	NY	BSNY	no	B	PARTNER	1
20	4	BS	NY	BSNY	no	T	PARTNER	0
1	1	BS	ZA	BSZA	no	T	PARTNER	1
2	9	BS	ZA	BSZA	no	T	PARTNER	0
3	9	BS	ZA	BSZA	no	B	PARTNER	1
4	9	BS	ZA	BSZA	no	B	PARTNER	1
5	9	BS	ZA	BSZA	no	T	PARTNER	0
6	9	BS	ZA	BSZA	no	B	PARTNER	1
7	9	BS	ZA	BSZA	no	B	PARTNER	1
8	9	BS	ZA	BSZA	no	B	PARTNER	1
9	10	BS	ZA	BSZA	no	T	PARTNER	0
1	4	BS	MO	BSMO	no	T	PARTNER	1
2	4	BS	MO	BSMO	no	T	PARTNER	1
3	4	BS	MO	BSMO	no	B	PARTNER	0
4	4	BS	MO	BSMO	no	B	PARTNER	0
5	4	BS	MO	BSMO	no	T	PARTNER	1
6	4	BS	MO	BSMO	no	T	PARTNER	1
7	4	BS	MO	BSMO	no	T	PARTNER	1
8	4	BS	MO	BSMO	no	T	PARTNER	0
9	4	BS	MO	BSMO	no	B	PARTNER	0
10	4	BS	MO	BSMO	no	T	PARTNER	1
11	4	BS	MO	BSMO	no	B	PARTNER	0
12	4	BS	MO	BSMO	no	B	PARTNER	0
13	4	BS	MO	BSMO	no	B	PARTNER	0
14	4	BS	MO	BSMO	no	T	PARTNER	0
15	4	BS	MO	BSMO	no	T	PARTNER	1
16	4	BS	MO	BSMO	no	B	PARTNER	0
17	4	BS	MO	BSMO	no	B	PARTNER	1
18	4	BS	MO	BSMO	no	B	PARTNER	0
1	3	BS	SZ	BSSZ	YES	T	PARTNER	0
2	3	BS	SZ	BSSZ	YES	B	PARTNER	1
3	3	BS	SZ	BSSZ	YES	B	PARTNER	1
4	3	BS	SZ	BSSZ	YES	T	PARTNER	1
5	3	BS	SZ	BSSZ	YES	B	PARTNER	1
6	3	BS	SZ	BSSZ	YES	T	PARTNER	1
7	3	BS	SZ	BSSZ	YES	B	PARTNER	1
8	3	BS	SZ	BSSZ	YES	T	PARTNER	1
9	6	BS	SZ	BSSZ	YES	T	PARTNER	1
10	6	BS	SZ	BSSZ	YES	B	PARTNER	0
11	8	BS	SZ	BSSZ	YES	B	PARTNER	0
12	8	BS	SZ	BSSZ	YES	T	PARTNER	1
13	8	BS	SZ	BSSZ	YES	T	PARTNER	0
14	8	BS	SZ	BSSZ	YES	B	PARTNER	1
15	8	BS	SZ	BSSZ	YES	B	PARTNER	1
16	8	BS	SZ	BSSZ	YES	T	PARTNER	0
17	8	BS	SZ	BSSZ	YES	T	PARTNER	0
1	1	DJ	BS	BSDJ	no	B	PARTNER	1
2	5	DJ	BS	BSDJ	no	T	PARTNER	1
3	5	DJ	BS	BSDJ	no	T	PARTNER	0
4	7	DJ	BS	BSDJ	no	B	PARTNER	0
5	7	DJ	BS	BSDJ	no	B	PARTNER	0
6	7	DJ	BS	BSDJ	no	T	PARTNER	0
7	7	DJ	BS	BSDJ	no	T	PARTNER	0
8	7	DJ	BS	BSDJ	no	B	PARTNER	0
9	7	DJ	BS	BSDJ	no	B	PARTNER	1
10	7	DJ	BS	BSDJ	no	T	PARTNER	1
11	7	DJ	BS	BSDJ	no	B	PARTNER	1
12	7	DJ	BS	BSDJ	no	B	PARTNER	0
13	7	DJ	BS	BSDJ	no	T	PARTNER	0
1	1	DJ	HB	DJHB	YES	T	PARTNER	0
2	1	DJ	HB	DJHB	YES	T	PARTNER	0
3	1	DJ	HB	DJHB	YES	T	PARTNER	0
4	1	DJ	HB	DJHB	YES	B	PARTNER	1
5	1	DJ	HB	DJHB	YES	B	PARTNER	1
6	1	DJ	HB	DJHB	YES	T	PARTNER	0
7	1	DJ	HB	DJHB	YES	T	PARTNER	0
8	1	DJ	HB	DJHB	YES	B	PARTNER	1
9	1	DJ	HB	DJHB	YES	B	PARTNER	1
10	1	DJ	HB	DJHB	YES	B	PARTNER	1
11	1	DJ	HB	DJHB	YES	T	PARTNER	0
12	1	DJ	HB	DJHB	YES	B	PARTNER	1
13	1	DJ	HB	DJHB	YES	T	PARTNER	0
14	1	DJ	HB	DJHB	YES	B	PARTNER	1
15	1	DJ	HB	DJHB	YES	B	PARTNER	1
16	1	DJ	HB	DJHB	YES	T	PARTNER	0
17	1	DJ	HB	DJHB	YES	T	PARTNER	0
18	1	DJ	HB	DJHB	YES	B	PARTNER	1
19	1	DJ	HB	DJHB	YES	B	PARTNER	1
20	1	DJ	HB	DJHB	YES	T	PARTNER	0
1	7	DJ	HO	DJHO	no	T	PARTNER	0
2	7	DJ	HO	DJHO	no	B	PARTNER	0
3	8	DJ	HO	DJHO	no	T	PARTNER	0
4	8	DJ	HO	DJHO	no	B	PARTNER	1
1	1	DJ	KG	DJKG	no	B	PARTNER	0
2	1	DJ	KG	DJKG	no	T	PARTNER	1
3	1	DJ	KG	DJKG	no	B	PARTNER	1
4	1	DJ	KG	DJKG	no	T	PARTNER	1
5	1	DJ	KG	DJKG	no	T	PARTNER	1
6	1	DJ	KG	DJKG	no	B	PARTNER	1
7	1	DJ	KG	DJKG	no	T	PARTNER	0
8	1	DJ	KG	DJKG	no	T	PARTNER	0
9	1	DJ	KG	DJKG	no	B	PARTNER	1
10	1	DJ	KG	DJKG	no	T	PARTNER	0
11	1	DJ	KG	DJKG	no	B	PARTNER	1
12	1	DJ	KG	DJKG	no	T	PARTNER	0
13	1	DJ	KG	DJKG	no	T	PARTNER	0
14	1	DJ	KG	DJKG	no	B	PARTNER	1
15	1	DJ	KG	DJKG	no	B	PARTNER	1
16	1	DJ	KG	DJKG	no	T	PARTNER	0
17	1	DJ	KG	DJKG	no	T	PARTNER	0
18	1	DJ	KG	DJKG	no	B	PARTNER	1
19	1	DJ	KG	DJKG	no	B	PARTNER	1
20	1	DJ	KG	DJKG	no	B	PARTNER	1
1	5	DJ	MZ	DJMZ	no	B	PARTNER	1
2	5	DJ	MZ	DJMZ	no	T	PARTNER	0
3	5	DJ	MZ	DJMZ	no	T	PARTNER	0
4	5	DJ	MZ	DJMZ	no	B	PARTNER	0
1	1	DJ	NY	DJNY	YES	T	PARTNER	1
2	1	DJ	NY	DJNY	YES	T	PARTNER	0
3	1	DJ	NY	DJNY	YES	B	PARTNER	1
4	1	DJ	NY	DJNY	YES	B	PARTNER	1
5	1	DJ	NY	DJNY	YES	T	PARTNER	0
6	1	DJ	NY	DJNY	YES	B	PARTNER	1
7	1	DJ	NY	DJNY	YES	T	PARTNER	0
8	1	DJ	NY	DJNY	YES	B	PARTNER	1
9	1	DJ	NY	DJNY	YES	T	PARTNER	0
10	1	DJ	NY	DJNY	YES	T	PARTNER	0
11	1	DJ	NY	DJNY	YES	B	PARTNER	1
12	1	DJ	NY	DJNY	YES	B	PARTNER	1
13	1	DJ	NY	DJNY	YES	B	PARTNER	1
14	1	DJ	NY	DJNY	YES	T	PARTNER	0
15	1	DJ	NY	DJNY	YES	T	PARTNER	0
16	1	DJ	NY	DJNY	YES	B	PARTNER	1
17	1	DJ	NY	DJNY	YES	B	PARTNER	1
18	1	DJ	NY	DJNY	YES	T	PARTNER	0
19	1	DJ	NY	DJNY	YES	B	PARTNER	1
20	2	DJ	NY	DJNY	YES	B	PARTNER	1
1	8	DJ	KK	DJKK	no	T	PARTNER	1
2	8	DJ	KK	DJKK	no	B	PARTNER	0
3	8	DJ	KK	DJKK	no	B	PARTNER	0
4	9	DJ	KK	DJKK	no	T	PARTNER	1
5	9	DJ	KK	DJKK	no	B	PARTNER	1
1	1	DJ	SZ	DJSZ	no	T	PARTNER	1
2	1	DJ	SZ	DJSZ	no	B	PARTNER	0
3	7	DJ	SZ	DJSZ	no	T	PARTNER	0
1	5	DJ	BY	DJBY	no	T	PARTNER	1
1	3	HB	BS	BSHB	no	B	PARTNER	0
2	6	HB	BS	BSHB	no	T	PARTNER	1
3	7	HB	BS	BSHB	no	T	PARTNER	0
4	7	HB	BS	BSHB	no	B	PARTNER	1
5	7	HB	BS	BSHB	no	B	PARTNER	1
6	7	HB	BS	BSHB	no	T	PARTNER	0
7	7	HB	BS	BSHB	no	B	PARTNER	1
8	7	HB	BS	BSHB	no	T	PARTNER	0
1	2	HB	DJ	DJHB	YES	T	PARTNER	0
2	2	HB	DJ	DJHB	YES	B	PARTNER	1
3	2	HB	DJ	DJHB	YES	T	PARTNER	1
4	2	HB	DJ	DJHB	YES	T	PARTNER	0
5	2	HB	DJ	DJHB	YES	B	PARTNER	1
6	2	HB	DJ	DJHB	YES	B	PARTNER	1
7	2	HB	DJ	DJHB	YES	T	PARTNER	0
8	2	HB	DJ	DJHB	YES	B	PARTNER	0
9	2	HB	DJ	DJHB	YES	T	PARTNER	0
10	2	HB	DJ	DJHB	YES	B	PARTNER	1
11	2	HB	DJ	DJHB	YES	T	PARTNER	0
12	2	HB	DJ	DJHB	YES	B	PARTNER	1
13	2	HB	DJ	DJHB	YES	T	PARTNER	0
14	2	HB	DJ	DJHB	YES	B	PARTNER	0
15	2	HB	DJ	DJHB	YES	B	PARTNER	1
16	2	HB	DJ	DJHB	YES	T	PARTNER	0
17	2	HB	DJ	DJHB	YES	B	PARTNER	1
18	2	HB	DJ	DJHB	YES	T	PARTNER	0
19	2	HB	DJ	DJHB	YES	B	PARTNER	1
20	3	HB	DJ	DJHB	YES	T	PARTNER	1
1	7	HB	HO	HBHO	no	T	PARTNER	0
2	7	HB	HO	HBHO	no	B	PARTNER	1
3	7	HB	HO	HBHO	no	B	PARTNER	1
4	7	HB	HO	HBHO	no	T	PARTNER	1
5	7	HB	HO	HBHO	no	T	PARTNER	0
6	7	HB	HO	HBHO	no	B	PARTNER	1
7	7	HB	HO	HBHO	no	B	PARTNER	1
8	7	HB	HO	HBHO	no	T	PARTNER	0
9	7	HB	HO	HBHO	no	T	PARTNER	1
10	7	HB	HO	HBHO	no	B	PARTNER	1
11	7	HB	HO	HBHO	no	B	PARTNER	1
12	7	HB	HO	HBHO	no	T	PARTNER	0
13	7	HB	HO	HBHO	no	B	PARTNER	1
14	7	HB	HO	HBHO	no	B	PARTNER	1
15	7	HB	HO	HBHO	no	T	PARTNER	1
16	7	HB	HO	HBHO	no	T	PARTNER	0
17	7	HB	HO	HBHO	no	T	PARTNER	1
18	7	HB	HO	HBHO	no	B	PARTNER	1
19	7	HB	HO	HBHO	no	B	PARTNER	1
20	8	HB	HO	HBHO	no	T	PARTNER	0
1	2	HB	KG	HBKG	no	T	PARTNER	0
2	4	HB	KG	HBKG	YES	T	PARTNER	0
1	2	HB	NY	HBNY	YES	T	PARTNER	0
2	2	HB	NY	HBNY	YES	T	PARTNER	0
3	2	HB	NY	HBNY	YES	T	PARTNER	0
4	2	HB	NY	HBNY	YES	B	PARTNER	1
5	2	HB	NY	HBNY	YES	T	PARTNER	1
6	2	HB	NY	HBNY	YES	T	PARTNER	0
7	2	HB	NY	HBNY	YES	B	PARTNER	1
8	2	HB	NY	HBNY	YES	T	PARTNER	1
9	2	HB	NY	HBNY	YES	T	PARTNER	0
10	2	HB	NY	HBNY	YES	B	PARTNER	1
11	2	HB	NY	HBNY	YES	T	PARTNER	1
12	2	HB	NY	HBNY	YES	T	PARTNER	0
13	2	HB	NY	HBNY	YES	B	PARTNER	1
14	2	HB	NY	HBNY	YES	T	PARTNER	0
15	2	HB	NY	HBNY	YES	B	PARTNER	1
16	2	HB	NY	HBNY	YES	T	PARTNER	0
17	2	HB	NY	HBNY	YES	B	PARTNER	1
18	2	HB	NY	HBNY	YES	B	PARTNER	1
19	8	HB	NY	HBNY	YES	T	PARTNER	0
20	8	HB	NY	HBNY	YES	T	PARTNER	0
1	9	HB	ZA	HBZA	no	T	PARTNER	1
1	3	HB	KK	HBKK	no	T	PARTNER	1
2	3	HB	KK	HBKK	no	B	PARTNER	0
3	3	HB	KK	HBKK	no	B	PARTNER	1
4	3	HB	KK	HBKK	no	T	PARTNER	1
5	3	HB	KK	HBKK	no	T	PARTNER	0
6	3	HB	KK	HBKK	no	B	PARTNER	0
7	3	HB	KK	HBKK	no	T	PARTNER	0
8	3	HB	KK	HBKK	no	T	PARTNER	0
9	3	HB	KK	HBKK	no	T	PARTNER	0
10	3	HB	KK	HBKK	no	B	PARTNER	0
11	3	HB	KK	HBKK	no	T	PARTNER	1
12	3	HB	KK	HBKK	no	T	PARTNER	0
13	3	HB	KK	HBKK	no	B	PARTNER	1
14	4	HB	KK	HBKK	no	T	PARTNER	0
15	4	HB	KK	HBKK	no	T	PARTNER	0
16	4	HB	KK	HBKK	no	B	PARTNER	1
17	4	HB	KK	HBKK	no	T	PARTNER	0
1	2	HB	MO	HBMO	no	B	PARTNER	1
2	3	HB	MO	HBMO	no	T	PARTNER	1
3	3	HB	MO	HBMO	no	T	PARTNER	1
4	3	HB	MO	HBMO	no	T	PARTNER	0
5	3	HB	MO	HBMO	no	B	PARTNER	1
6	3	HB	MO	HBMO	no	T	PARTNER	0
7	3	HB	MO	HBMO	no	B	PARTNER	1
8	4	HB	MO	HBMO	no	B	PARTNER	1
9	7	HB	MO	HBMO	no	T	PARTNER	0
1	3	HB	SZ	HBSZ	no	T	PARTNER	0
2	8	HB	SZ	HBSZ	no	B	PARTNER	1
1	3	KG	BS	BSKG	no	T	PARTNER	1
2	3	KG	BS	BSKG	no	T	PARTNER	0
3	3	KG	BS	BSKG	no	T	PARTNER	1
4	3	KG	BS	BSKG	no	T	PARTNER	1
5	3	KG	BS	BSKG	no	B	PARTNER	1
6	3	KG	BS	BSKG	no	T	PARTNER	1
7	3	KG	BS	BSKG	no	B	PARTNER	1
8	3	KG	BS	BSKG	no	T	PARTNER	0
9	3	KG	BS	BSKG	no	B	PARTNER	0
10	3	KG	BS	BSKG	no	T	PARTNER	0
11	3	KG	BS	BSKG	no	B	PARTNER	1
12	3	KG	BS	BSKG	no	T	PARTNER	1
13	3	KG	BS	BSKG	no	B	PARTNER	0
14	3	KG	BS	BSKG	no	B	PARTNER	0
15	3	KG	BS	BSKG	no	T	PARTNER	1
16	3	KG	BS	BSKG	no	B	PARTNER	0
17	3	KG	BS	BSKG	no	B	PARTNER	0
18	3	KG	BS	BSKG	no	T	PARTNER	1
19	3	KG	BS	BSKG	no	B	PARTNER	0
20	3	KG	BS	BSKG	no	T	PARTNER	1
1	1	KG	DJ	DJKG	no	B	PARTNER	0
2	2	KG	DJ	DJKG	no	T	PARTNER	1
3	2	KG	DJ	DJKG	no	T	PARTNER	0
4	2	KG	DJ	DJKG	no	T	PARTNER	0
5	2	KG	DJ	DJKG	no	B	PARTNER	1
6	2	KG	DJ	DJKG	no	B	PARTNER	1
7	2	KG	DJ	DJKG	no	T	PARTNER	0
8	2	KG	DJ	DJKG	no	B	PARTNER	1
9	2	KG	DJ	DJKG	no	T	PARTNER	0
10	2	KG	DJ	DJKG	no	B	PARTNER	1
11	2	KG	DJ	DJKG	no	B	PARTNER	1
12	2	KG	DJ	DJKG	no	B	PARTNER	0
13	2	KG	DJ	DJKG	no	T	PARTNER	1
14	2	KG	DJ	DJKG	no	B	PARTNER	0
15	2	KG	DJ	DJKG	no	B	PARTNER	0
16	2	KG	DJ	DJKG	no	T	PARTNER	1
17	2	KG	DJ	DJKG	no	T	PARTNER	1
18	2	KG	DJ	DJKG	no	B	PARTNER	1
19	2	KG	DJ	DJKG	no	B	PARTNER	1
20	2	KG	DJ	DJKG	no	T	PARTNER	0
1	3	KG	HB	HBKG	no	T	PARTNER	1
2	3	KG	HB	HBKG	no	B	PARTNER	0
3	3	KG	HB	HBKG	no	B	PARTNER	0
4	3	KG	HB	HBKG	no	T	PARTNER	1
5	3	KG	HB	HBKG	no	T	PARTNER	1
6	3	KG	HB	HBKG	no	B	PARTNER	0
7	3	KG	HB	HBKG	no	T	PARTNER	1
8	4	KG	HB	HBKG	no	T	PARTNER	0
9	4	KG	HB	HBKG	no	B	PARTNER	1
10	4	KG	HB	HBKG	no	T	PARTNER	0
11	4	KG	HB	HBKG	no	T	PARTNER	0
12	4	KG	HB	HBKG	no	B	PARTNER	1
13	4	KG	HB	HBKG	no	T	PARTNER	1
14	4	KG	HB	HBKG	no	B	PARTNER	1
15	4	KG	HB	HBKG	no	B	PARTNER	0
16	4	KG	HB	HBKG	no	T	PARTNER	0
17	4	KG	HB	HBKG	no	T	PARTNER	0
18	4	KG	HB	HBKG	no	B	PARTNER	0
19	4	KG	HB	HBKG	no	B	PARTNER	0
20	5	KG	HB	HBKG	no	B	PARTNER	1
1	2	KG	MZ	KGMZ	no	T	PARTNER	0
2	2	KG	MZ	KGMZ	no	B	PARTNER	1
3	6	KG	MZ	KGMZ	no	T	PARTNER	0
4	6	KG	MZ	KGMZ	no	B	PARTNER	0
1	1	KG	NY	KGNY	no	T	PARTNER	1
2	1	KG	NY	KGNY	no	B	PARTNER	1
3	3	KG	NY	KGNY	no	T	PARTNER	1
4	3	KG	NY	KGNY	no	B	PARTNER	0
5	3	KG	NY	KGNY	no	B	PARTNER	0
6	3	KG	NY	KGNY	no	T	PARTNER	1
7	5	KG	NY	KGNY	no	T	PARTNER	1
8	5	KG	NY	KGNY	no	B	PARTNER	1
9	5	KG	NY	KGNY	no	T	PARTNER	0
10	5	KG	NY	KGNY	no	B	PARTNER	0
11	9	KG	NY	KGNY	no	T	PARTNER	0
12	9	KG	NY	KGNY	no	B	PARTNER	0
13	9	KG	NY	KGNY	no	B	PARTNER	1
14	9	KG	NY	KGNY	no	B	PARTNER	1
15	9	KG	NY	KGNY	no	T	PARTNER	1
16	9	KG	NY	KGNY	no	T	PARTNER	1
17	9	KG	NY	KGNY	no	T	PARTNER	1
18	9	KG	NY	KGNY	no	B	PARTNER	0
19	9	KG	NY	KGNY	no	B	PARTNER	1
1	5	KG	ZA	KGZA	no	T	PARTNER	1
1	3	KG	KK	KGKK	no	T	PARTNER	1
2	3	KG	KK	KGKK	no	B	PARTNER	1
3	5	KG	KK	KGKK	no	B	PARTNER	1
4	5	KG	KK	KGKK	no	T	PARTNER	0
5	5	KG	KK	KGKK	no	T	PARTNER	0
6	6	KG	KK	KGKK	no	T	PARTNER	0
7	6	KG	KK	KGKK	no	B	PARTNER	1
8	6	KG	KK	KGKK	no	T	PARTNER	0
9	6	KG	KK	KGKK	no	B	PARTNER	1
10	6	KG	KK	KGKK	no	T	PARTNER	1
11	6	KG	KK	KGKK	no	B	PARTNER	1
12	6	KG	KK	KGKK	no	T	PARTNER	1
13	9	KG	KK	KGKK	no	T	PARTNER	1
14	9	KG	KK	KGKK	no	B	PARTNER	0
15	9	KG	KK	KGKK	no	T	PARTNER	1
16	9	KG	KK	KGKK	no	B	PARTNER	0
1	3	KG	MO	KGMO	YES	T	PARTNER	0
2	4	KG	MO	KGMO	YES	T	PARTNER	1
3	4	KG	MO	KGMO	YES	B	PARTNER	0
4	4	KG	MO	KGMO	YES	T	PARTNER	1
5	5	KG	MO	KGMO	YES	T	PARTNER	0
6	5	KG	MO	KGMO	YES	B	PARTNER	0
7	5	KG	MO	KGMO	YES	T	PARTNER	0
8	5	KG	MO	KGMO	YES	T	PARTNER	1
9	6	KG	MO	KGMO	YES	T	PARTNER	0
10	6	KG	MO	KGMO	YES	B	PARTNER	1
11	6	KG	MO	KGMO	YES	B	PARTNER	1
12	8	KG	MO	KGMO	YES	T	PARTNER	0
13	9	KG	MO	KGMO	YES	T	PARTNER	1
14	9	KG	MO	KGMO	YES	T	PARTNER	1
15	9	KG	MO	KGMO	YES	B	PARTNER	0
16	9	KG	MO	KGMO	YES	B	PARTNER	1
17	9	KG	MO	KGMO	YES	B	PARTNER	0
18	9	KG	MO	KGMO	YES	B	PARTNER	0
1	2	MZ	NY	MZNY	no	T	PARTNER	1
2	2	MZ	NY	MZNY	no	B	PARTNER	1
1	1	MZ	ZA	MZZA	no	T	PARTNER	0
2	7	MZ	ZA	MZZA	no	T	PARTNER	1
1	4	MZ	KK	KKMZ	no	T	PARTNER	0
2	4	MZ	KK	KKMZ	no	B	PARTNER	0
3	10	MZ	KK	KKMZ	no	T	PARTNER	0
4	10	MZ	KK	KKMZ	no	T	PARTNER	1
5	10	MZ	KK	KKMZ	no	B	PARTNER	1
6	10	MZ	KK	KKMZ	no	T	PARTNER	0
7	10	MZ	KK	KKMZ	no	B	PARTNER	1
8	10	MZ	KK	KKMZ	no	B	PARTNER	1
1	5	NY	BS	BSNY	no	T	PARTNER	0
1	2	NY	DJ	DJNY	YES	T	PARTNER	0
2	2	NY	DJ	DJNY	YES	T	PARTNER	0
3	2	NY	DJ	DJNY	YES	T	PARTNER	0
4	2	NY	DJ	DJNY	YES	B	PARTNER	1
5	2	NY	DJ	DJNY	YES	T	PARTNER	0
1	2	NY	HB	HBNY	YES	B	PARTNER	0
2	8	NY	HB	HBNY	YES	B	PARTNER	1
1	8	NY	HO	HONY	no	T	PARTNER	0
1	2	NY	MZ	MZNY	no	T	PARTNER	1
2	8	NY	MZ	MZNY	no	T	PARTNER	0
3	10	NY	MZ	MZNY	no	T	PARTNER	1
1	5	NY	ZA	NYZA	no	B	PARTNER	1
2	5	NY	ZA	NYZA	no	T	PARTNER	1
3	5	NY	ZA	NYZA	no	T	PARTNER	0
4	5	NY	ZA	NYZA	no	T	PARTNER	0
5	5	NY	ZA	NYZA	no	B	PARTNER	1
6	5	NY	ZA	NYZA	no	B	PARTNER	1
7	5	NY	ZA	NYZA	no	T	PARTNER	0
8	5	NY	ZA	NYZA	no	B	PARTNER	1
9	5	NY	ZA	NYZA	no	B	PARTNER	1
10	5	NY	ZA	NYZA	no	T	PARTNER	0
11	6	NY	ZA	NYZA	no	T	PARTNER	0
12	6	NY	ZA	NYZA	no	T	PARTNER	0
13	6	NY	ZA	NYZA	no	B	PARTNER	1
14	6	NY	ZA	NYZA	no	B	PARTNER	1
15	8	NY	ZA	NYZA	no	T	PARTNER	0
16	10	NY	ZA	NYZA	no	T	PARTNER	0
17	10	NY	ZA	NYZA	no	B	PARTNER	1
18	10	NY	ZA	NYZA	no	T	PARTNER	1
1	1	NY	KK	KKNY	no	T	PARTNER	0
2	1	NY	KK	KKNY	no	T	PARTNER	0
3	2	NY	KK	KKNY	no	B	PARTNER	1
4	3	NY	KK	KKNY	no	T	PARTNER	1
5	5	NY	KK	KKNY	no	T	PARTNER	0
6	5	NY	KK	KKNY	no	B	PARTNER	1
7	6	NY	KK	KKNY	no	T	PARTNER	1
8	6	NY	KK	KKNY	no	B	PARTNER	1
9	6	NY	KK	KKNY	no	B	PARTNER	1
10	6	NY	KK	KKNY	no	B	PARTNER	0
11	6	NY	KK	KKNY	no	B	PARTNER	1
12	6	NY	KK	KKNY	no	B	PARTNER	1
13	6	NY	KK	KKNY	no	B	PARTNER	1
14	6	NY	KK	KKNY	no	T	PARTNER	0
15	6	NY	KK	KKNY	no	T	PARTNER	0
16	6	NY	KK	KKNY	no	T	PARTNER	0
17	6	NY	KK	KKNY	no	B	PARTNER	1
18	6	NY	KK	KKNY	no	T	PARTNER	0
19	6	NY	KK	KKNY	no	B	PARTNER	1
20	8	NY	KK	KKNY	no	B	PARTNER	1
1	4	KK	HO	HOKK	YES	T	PARTNER	1
2	4	KK	HO	HOKK	YES	B	PARTNER	0
3	4	KK	HO	HOKK	YES	T	PARTNER	1
1	1	KK	NY	KKNY	no	B	PARTNER	0
2	2	KK	NY	KKNY	no	T	PARTNER	1
3	2	KK	NY	KKNY	no	T	PARTNER	0
4	3	KK	NY	KKNY	no	T	PARTNER	1
5	3	KK	NY	KKNY	no	B	PARTNER	0
6	3	KK	NY	KKNY	no	B	PARTNER	0
7	3	KK	NY	KKNY	no	T	PARTNER	1
8	4	KK	NY	KKNY	no	T	PARTNER	1
9	9	KK	NY	KKNY	no	T	PARTNER	1
10	10	KK	NY	KKNY	no	T	PARTNER	1
11	10	KK	NY	KKNY	no	B	PARTNER	0
1	2	KK	VI	KKVI	YES	B	PARTNER	0
2	2	KK	VI	KKVI	YES	T	PARTNER	1
3	2	KK	VI	KKVI	YES	B	PARTNER	1
4	2	KK	VI	KKVI	YES	T	PARTNER	0
5	2	KK	VI	KKVI	YES	T	PARTNER	0
1	8	KK	ZA	KKZA	YES	T	PARTNER	1
2	9	KK	ZA	KKZA	YES	T	PARTNER	1
1	3	KK	MO	KKMO	no	B	PARTNER	0
1	11	BS	NA	NA	NA	T	ALONE	1
2	11	BS	NA	NA	NA	T	ALONE	0
3	11	BS	NA	NA	NA	B	ALONE	1
4	11	BS	NA	NA	NA	B	ALONE	1
5	11	BS	NA	NA	NA	T	ALONE	0
6	11	BS	NA	NA	NA	T	ALONE	0
7	11	BS	NA	NA	NA	T	ALONE	0
8	11	BS	NA	NA	NA	B	ALONE	0
9	11	BS	NA	NA	NA	B	ALONE	1
10	11	BS	NA	NA	NA	B	ALONE	0
11	11	BS	NA	NA	NA	B	ALONE	1
12	11	BS	NA	NA	NA	T	ALONE	0
13	11	BS	NA	NA	NA	T	ALONE	0
14	11	BS	NA	NA	NA	B	ALONE	1
15	11	BS	NA	NA	NA	T	ALONE	0
16	11	BS	NA	NA	NA	T	ALONE	0
17	11	BS	NA	NA	NA	B	ALONE	1
18	11	BS	NA	NA	NA	B	ALONE	1
19	11	BS	NA	NA	NA	T	ALONE	0
1	11	DJ	NA	NA	NA	B	ALONE	1
2	11	DJ	NA	NA	NA	T	ALONE	0
3	11	DJ	NA	NA	NA	T	ALONE	1
4	11	DJ	NA	NA	NA	B	ALONE	1
5	11	DJ	NA	NA	NA	T	ALONE	1
6	11	DJ	NA	NA	NA	B	ALONE	0
7	11	DJ	NA	NA	NA	B	ALONE	1
8	11	DJ	NA	NA	NA	T	ALONE	0
9	11	DJ	NA	NA	NA	T	ALONE	0
10	11	DJ	NA	NA	NA	B	ALONE	1
11	11	DJ	NA	NA	NA	B	ALONE	1
12	11	DJ	NA	NA	NA	T	ALONE	0
13	11	DJ	NA	NA	NA	T	ALONE	0
14	11	DJ	NA	NA	NA	B	ALONE	1
15	11	DJ	NA	NA	NA	B	ALONE	1
16	11	DJ	NA	NA	NA	T	ALONE	0
17	11	DJ	NA	NA	NA	B	ALONE	1
18	11	DJ	NA	NA	NA	T	ALONE	0
19	11	DJ	NA	NA	NA	T	ALONE	0
20	11	DJ	NA	NA	NA	B	ALONE	1
1	11	HB	NA	NA	NA	T	ALONE	0
2	11	HB	NA	NA	NA	T	ALONE	0
3	11	HB	NA	NA	NA	T	ALONE	0
4	11	HB	NA	NA	NA	T	ALONE	0
5	11	HB	NA	NA	NA	T	ALONE	1
6	11	HB	NA	NA	NA	T	ALONE	0
7	11	HB	NA	NA	NA	T	ALONE	0
8	11	HB	NA	NA	NA	T	ALONE	0
9	11	HB	NA	NA	NA	B	ALONE	1
10	11	HB	NA	NA	NA	B	ALONE	1
11	11	HB	NA	NA	NA	B	ALONE	1
12	11	HB	NA	NA	NA	B	ALONE	1
13	11	HB	NA	NA	NA	B	ALONE	1
14	11	HB	NA	NA	NA	T	ALONE	0
15	11	HB	NA	NA	NA	B	ALONE	1
16	11	HB	NA	NA	NA	B	ALONE	1
17	11	HB	NA	NA	NA	T	ALONE	0
18	11	HB	NA	NA	NA	B	ALONE	1
19	11	HB	NA	NA	NA	B	ALONE	1
1	11	KG	NA	NA	NA	T	ALONE	1
2	11	KG	NA	NA	NA	T	ALONE	1
3	11	KG	NA	NA	NA	T	ALONE	0
4	11	KG	NA	NA	NA	T	ALONE	1
5	11	KG	NA	NA	NA	B	ALONE	1
6	11	KG	NA	NA	NA	B	ALONE	1
7	11	KG	NA	NA	NA	B	ALONE	0
8	11	KG	NA	NA	NA	B	ALONE	0
9	11	KG	NA	NA	NA	B	ALONE	1
10	11	KG	NA	NA	NA	T	ALONE	0
11	11	KG	NA	NA	NA	T	ALONE	0
12	11	KG	NA	NA	NA	B	ALONE	0
13	11	KG	NA	NA	NA	T	ALONE	0
14	11	KG	NA	NA	NA	T	ALONE	1
15	11	KG	NA	NA	NA	B	ALONE	1
16	11	KG	NA	NA	NA	B	ALONE	1
17	11	KG	NA	NA	NA	B	ALONE	1
18	11	KG	NA	NA	NA	T	ALONE	1
19	11	KG	NA	NA	NA	B	ALONE	1
20	11	KG	NA	NA	NA	T	ALONE	0
1	12	MZ	NA	NA	NA	T	ALONE	0
2	12	MZ	NA	NA	NA	T	ALONE	0
3	12	MZ	NA	NA	NA	B	ALONE	1
4	12	MZ	NA	NA	NA	B	ALONE	1
5	12	MZ	NA	NA	NA	B	ALONE	1
6	12	MZ	NA	NA	NA	T	ALONE	0
7	12	MZ	NA	NA	NA	T	ALONE	0
8	12	MZ	NA	NA	NA	T	ALONE	0
9	12	MZ	NA	NA	NA	B	ALONE	1
10	12	MZ	NA	NA	NA	B	ALONE	1
11	12	MZ	NA	NA	NA	T	ALONE	0
12	12	MZ	NA	NA	NA	T	ALONE	0
13	12	MZ	NA	NA	NA	B	ALONE	1
14	12	MZ	NA	NA	NA	T	ALONE	0
15	12	MZ	NA	NA	NA	B	ALONE	1
16	12	MZ	NA	NA	NA	T	ALONE	0
17	12	MZ	NA	NA	NA	B	ALONE	1
18	12	MZ	NA	NA	NA	B	ALONE	1
19	12	MZ	NA	NA	NA	B	ALONE	1
20	12	MZ	NA	NA	NA	T	ALONE	0
1	11	NY	NA	NA	NA	T	ALONE	1
2	11	NY	NA	NA	NA	B	ALONE	0
3	11	NY	NA	NA	NA	T	ALONE	0
1	12	KK	NA	NA	NA	T	ALONE	0
2	12	KK	NA	NA	NA	B	ALONE	1
3	12	KK	NA	NA	NA	B	ALONE	1
4	12	KK	NA	NA	NA	T	ALONE	1
5	12	KK	NA	NA	NA	T	ALONE	1
6	12	KK	NA	NA	NA	B	ALONE	0
7	12	KK	NA	NA	NA	T	ALONE	1
8	12	KK	NA	NA	NA	B	ALONE	0
9	12	KK	NA	NA	NA	B	ALONE	0
10	12	KK	NA	NA	NA	T	ALONE	1
11	12	KK	NA	NA	NA	T	ALONE	1
12	12	KK	NA	NA	NA	B	ALONE	0
13	12	KK	NA	NA	NA	T	ALONE	1
14	12	KK	NA	NA	NA	B	ALONE	1
15	12	KK	NA	NA	NA	B	ALONE	0
16	12	KK	NA	NA	NA	T	ALONE	1
17	12	KK	NA	NA	NA	T	ALONE	0
18	12	KK	NA	NA	NA	B	ALONE	0
19	12	KK	NA	NA	NA	B	ALONE	1
20	12	KK	NA	NA	NA	T	ALONE	0

## Sheet: testcontrproslong
	condition	choice	amount	total	prop
BS	control	pros	8	19	0.421053
DJ	control	pros	11	20	0.55
HB	control	pros	9	19	0.473684
KG	control	pros	12	20	0.6
MZ	control	pros	10	20	0.5
NY	control	pros	1	3	0.333333
KK	control	pros	11	20	0.55
BS	test	pros	58	103	0.563107
DJ	test	pros	41	90	0.455556
HB	test	pros	52	99	0.525253
KG	test	pros	63	118	0.533898
MZ	test	pros	7	12	0.583333
NY	test	pros	26	50	0.52
KK	test	pros	12	22	0.545455

## Sheet: testpasswilcox
ind	type	choice	amount	total	prop
BS	test	pros	58	103	0.563106796
DJ	test	pros	41	90	0.455555556
HB	test	pros	52	99	0.525252525
KG	test	pros	63	118	0.533898305
MZ	test	pros	7	12	0.583333333
NY	test	pros	26	50	0.52
KK	test	pros	12	22	0.545454545
BS	test	self	45	103	0.436893204
DJ	test	self	49	90	0.544444444
HB	test	self	47	99	0.474747475
KG	test	self	55	118	0.466101695
MZ	test	self	5	12	0.416666667
NY	test	self	24	50	0.48
KK	test	self	10	22	0.454545455

## Sheet: contrpasswilcox
ind	type	choice	amount	total	prop
BS	control	pros	8	19	0.421052632
DJ	control	pros	11	20	0.55
HB	control	pros	9	19	0.473684211
KG	control	pros	12	20	0.6
MZ	control	pros	10	20	0.5
NY	control	pros	1	3	0.333333333
KK	control	pros	11	20	0.55
BS	control	self	11	19	0.578947368
DJ	control	self	9	20	0.45
HB	control	self	10	19	0.526315789
KG	control	self	8	20	0.4
MZ	control	self	10	20	0.5
NY	control	self	2	3	0.666666667
KK	control	self	9	20	0.45

## Sheet: binomfirst20datapasscriterion
trial	session	actor	receiver	dyad	position	condition	pros
1	1	BS	DJ	BSDJ	B	PARTNER	1
1	1	BS	NY	BSNY	T	PARTNER	1
2	1	BS	NY	BSNY	B	PARTNER	0
3	1	BS	NY	BSNY	T	PARTNER	1
1	1	BS	ZA	BSZA	T	PARTNER	1
4	2	BS	NY	BSNY	T	PARTNER	0
5	3	BS	NY	BSNY	T	PARTNER	0
6	3	BS	NY	BSNY	T	PARTNER	1
7	3	BS	NY	BSNY	T	PARTNER	1
8	3	BS	NY	BSNY	T	PARTNER	0
9	3	BS	NY	BSNY	B	PARTNER	0
1	3	BS	SZ	BSSZ	T	PARTNER	0
2	3	BS	SZ	BSSZ	B	PARTNER	1
3	3	BS	SZ	BSSZ	B	PARTNER	1
4	3	BS	SZ	BSSZ	T	PARTNER	1
5	3	BS	SZ	BSSZ	B	PARTNER	1
6	3	BS	SZ	BSSZ	T	PARTNER	1
7	3	BS	SZ	BSSZ	B	PARTNER	1
8	3	BS	SZ	BSSZ	T	PARTNER	1
1	4	BS	KG	BSKG	T	PARTNER	1
1	1	DJ	BS	BSDJ	B	PARTNER	1
2	5	DJ	BS	BSDJ	T	PARTNER	1
3	5	DJ	BS	BSDJ	T	PARTNER	0
4	7	DJ	BS	BSDJ	B	PARTNER	0
5	7	DJ	BS	BSDJ	B	PARTNER	0
6	7	DJ	BS	BSDJ	T	PARTNER	0
7	7	DJ	BS	BSDJ	T	PARTNER	0
8	7	DJ	BS	BSDJ	B	PARTNER	0
9	7	DJ	BS	BSDJ	B	PARTNER	1
10	7	DJ	BS	BSDJ	T	PARTNER	1
11	7	DJ	BS	BSDJ	B	PARTNER	1
12	7	DJ	BS	BSDJ	B	PARTNER	0
13	7	DJ	BS	BSDJ	T	PARTNER	0
1	1	DJ	HB	DJHB	T	PARTNER	0
2	1	DJ	HB	DJHB	T	PARTNER	0
3	1	DJ	HB	DJHB	T	PARTNER	0
4	1	DJ	HB	DJHB	B	PARTNER	1
5	1	DJ	HB	DJHB	B	PARTNER	1
6	1	DJ	HB	DJHB	T	PARTNER	0
7	1	DJ	HB	DJHB	T	PARTNER	0
1	3	HB	BS	BSHB	B	PARTNER	0
2	6	HB	BS	BSHB	T	PARTNER	1
3	7	HB	BS	BSHB	T	PARTNER	0
4	7	HB	BS	BSHB	B	PARTNER	1
5	7	HB	BS	BSHB	B	PARTNER	1
6	7	HB	BS	BSHB	T	PARTNER	0
7	7	HB	BS	BSHB	B	PARTNER	1
8	7	HB	BS	BSHB	T	PARTNER	0
1	2	HB	DJ	DJHB	T	PARTNER	0
2	2	HB	DJ	DJHB	B	PARTNER	1
3	2	HB	DJ	DJHB	T	PARTNER	1
4	2	HB	DJ	DJHB	T	PARTNER	0
5	2	HB	DJ	DJHB	B	PARTNER	1
6	2	HB	DJ	DJHB	B	PARTNER	1
7	2	HB	DJ	DJHB	T	PARTNER	0
8	2	HB	DJ	DJHB	B	PARTNER	0
9	2	HB	DJ	DJHB	T	PARTNER	0
10	2	HB	DJ	DJHB	B	PARTNER	1
11	2	HB	DJ	DJHB	T	PARTNER	0
12	2	HB	DJ	DJHB	B	PARTNER	1
1	3	KG	BS	BSKG	T	PARTNER	1
2	3	KG	BS	BSKG	T	PARTNER	0
3	3	KG	BS	BSKG	T	PARTNER	1
4	3	KG	BS	BSKG	T	PARTNER	1
5	3	KG	BS	BSKG	B	PARTNER	1
6	3	KG	BS	BSKG	T	PARTNER	1
7	3	KG	BS	BSKG	B	PARTNER	1
8	3	KG	BS	BSKG	T	PARTNER	0
9	3	KG	BS	BSKG	B	PARTNER	0
10	3	KG	BS	BSKG	T	PARTNER	0
11	3	KG	BS	BSKG	B	PARTNER	1
12	3	KG	BS	BSKG	T	PARTNER	1
13	3	KG	BS	BSKG	B	PARTNER	0
14	3	KG	BS	BSKG	B	PARTNER	0
15	3	KG	BS	BSKG	T	PARTNER	1
16	3	KG	BS	BSKG	B	PARTNER	0
17	3	KG	BS	BSKG	B	PARTNER	0
18	3	KG	BS	BSKG	T	PARTNER	1
19	3	KG	BS	BSKG	B	PARTNER	0
20	3	KG	BS	BSKG	T	PARTNER	1
1	2	MZ	NY	MZNY	T	PARTNER	1
2	2	MZ	NY	MZNY	B	PARTNER	1
1	1	MZ	ZA	MZZA	T	PARTNER	0
2	7	MZ	ZA	MZZA	T	PARTNER	1
1	4	MZ	KK	KKMZ	T	PARTNER	0
2	4	MZ	KK	KKMZ	B	PARTNER	0
3	10	MZ	KK	KKMZ	T	PARTNER	0
4	10	MZ	KK	KKMZ	T	PARTNER	1
5	10	MZ	KK	KKMZ	B	PARTNER	1
6	10	MZ	KK	KKMZ	T	PARTNER	0
7	10	MZ	KK	KKMZ	B	PARTNER	1
8	10	MZ	KK	KKMZ	B	PARTNER	1
1	5	NY	BS	BSNY	T	PARTNER	0
1	2	NY	DJ	DJNY	T	PARTNER	0
2	2	NY	DJ	DJNY	T	PARTNER	0
3	2	NY	DJ	DJNY	T	PARTNER	0
4	2	NY	DJ	DJNY	B	PARTNER	1
5	2	NY	DJ	DJNY	T	PARTNER	0
1	2	NY	HB	HBNY	B	PARTNER	0
2	8	NY	HB	HBNY	B	PARTNER	1
1	8	NY	HO	HONY	T	PARTNER	0
1	2	NY	MZ	MZNY	T	PARTNER	1
2	8	NY	MZ	MZNY	T	PARTNER	0
3	10	NY	MZ	MZNY	T	PARTNER	1
1	5	NY	ZA	NYZA	B	PARTNER	1
2	5	NY	ZA	NYZA	T	PARTNER	1
3	5	NY	ZA	NYZA	T	PARTNER	0
4	5	NY	ZA	NYZA	T	PARTNER	0
5	5	NY	ZA	NYZA	B	PARTNER	1
6	5	NY	ZA	NYZA	B	PARTNER	1
7	5	NY	ZA	NYZA	T	PARTNER	0
8	5	NY	ZA	NYZA	B	PARTNER	1
1	4	KK	HO	HOKK	T	PARTNER	1
2	4	KK	HO	HOKK	B	PARTNER	0
3	4	KK	HO	HOKK	T	PARTNER	1
1	1	KK	NY	KKNY	B	PARTNER	0
2	2	KK	NY	KKNY	T	PARTNER	1
3	2	KK	NY	KKNY	T	PARTNER	0
4	3	KK	NY	KKNY	T	PARTNER	1
5	3	KK	NY	KKNY	B	PARTNER	0
6	3	KK	NY	KKNY	B	PARTNER	0
7	3	KK	NY	KKNY	T	PARTNER	1
8	4	KK	NY	KKNY	T	PARTNER	1
9	9	KK	NY	KKNY	T	PARTNER	1
10	10	KK	NY	KKNY	T	PARTNER	1
11	10	KK	NY	KKNY	B	PARTNER	0
1	2	KK	VI	KKVI	B	PARTNER	0
2	2	KK	VI	KKVI	T	PARTNER	1
3	2	KK	VI	KKVI	B	PARTNER	1
4	2	KK	VI	KKVI	T	PARTNER	0
5	2	KK	VI	KKVI	T	PARTNER	0
1	8	KK	ZA	KKZA	T	PARTNER	1
1	11	BS	NA	NA	T	ALONE	1
2	11	BS	NA	NA	T	ALONE	0
3	11	BS	NA	NA	B	ALONE	1
4	11	BS	NA	NA	B	ALONE	1
5	11	BS	NA	NA	T	ALONE	0
6	11	BS	NA	NA	T	ALONE	0
7	11	BS	NA	NA	T	ALONE	0
8	11	BS	NA	NA	B	ALONE	0
9	11	BS	NA	NA	B	ALONE	1
10	11	BS	NA	NA	B	ALONE	0
11	11	BS	NA	NA	B	ALONE	1
12	11	BS	NA	NA	T	ALONE	0
13	11	BS	NA	NA	T	ALONE	0
14	11	BS	NA	NA	B	ALONE	1
15	11	BS	NA	NA	T	ALONE	0
16	11	BS	NA	NA	T	ALONE	0
17	11	BS	NA	NA	B	ALONE	1
18	11	BS	NA	NA	B	ALONE	1
19	11	BS	NA	NA	T	ALONE	0
1	11	DJ	NA	NA	B	ALONE	1
2	11	DJ	NA	NA	T	ALONE	0
3	11	DJ	NA	NA	T	ALONE	1
4	11	DJ	NA	NA	B	ALONE	1
5	11	DJ	NA	NA	T	ALONE	1
6	11	DJ	NA	NA	B	ALONE	0
7	11	DJ	NA	NA	B	ALONE	1
8	11	DJ	NA	NA	T	ALONE	0
9	11	DJ	NA	NA	T	ALONE	0
10	11	DJ	NA	NA	B	ALONE	1
11	11	DJ	NA	NA	B	ALONE	1
12	11	DJ	NA	NA	T	ALONE	0
13	11	DJ	NA	NA	T	ALONE	0
14	11	DJ	NA	NA	B	ALONE	1
15	11	DJ	NA	NA	B	ALONE	1
16	11	DJ	NA	NA	T	ALONE	0
17	11	DJ	NA	NA	B	ALONE	1
18	11	DJ	NA	NA	T	ALONE	0
19	11	DJ	NA	NA	T	ALONE	0
20	11	DJ	NA	NA	B	ALONE	1
1	11	HB	NA	NA	T	ALONE	0
2	11	HB	NA	NA	T	ALONE	0
3	11	HB	NA	NA	T	ALONE	0
4	11	HB	NA	NA	T	ALONE	0
5	11	HB	NA	NA	T	ALONE	1
6	11	HB	NA	NA	T	ALONE	0
7	11	HB	NA	NA	T	ALONE	0
8	11	HB	NA	NA	T	ALONE	0
9	11	HB	NA	NA	B	ALONE	1
10	11	HB	NA	NA	B	ALONE	1
11	11	HB	NA	NA	B	ALONE	1
12	11	HB	NA	NA	B	ALONE	1
13	11	HB	NA	NA	B	ALONE	1
14	11	HB	NA	NA	T	ALONE	0
15	11	HB	NA	NA	B	ALONE	1
16	11	HB	NA	NA	B	ALONE	1
17	11	HB	NA	NA	T	ALONE	0
18	11	HB	NA	NA	B	ALONE	1
19	11	HB	NA	NA	B	ALONE	1
1	11	KG	NA	NA	T	ALONE	1
2	11	KG	NA	NA	T	ALONE	1
3	11	KG	NA	NA	T	ALONE	0
4	11	KG	NA	NA	T	ALONE	1
5	11	KG	NA	NA	B	ALONE	1
6	11	KG	NA	NA	B	ALONE	1
7	11	KG	NA	NA	B	ALONE	0
8	11	KG	NA	NA	B	ALONE	0
9	11	KG	NA	NA	B	ALONE	1
10	11	KG	NA	NA	T	ALONE	0
11	11	KG	NA	NA	T	ALONE	0
12	11	KG	NA	NA	B	ALONE	0
13	11	KG	NA	NA	T	ALONE	0
14	11	KG	NA	NA	T	ALONE	1
15	11	KG	NA	NA	B	ALONE	1
16	11	KG	NA	NA	B	ALONE	1
17	11	KG	NA	NA	B	ALONE	1
18	11	KG	NA	NA	T	ALONE	1
19	11	KG	NA	NA	B	ALONE	1
20	11	KG	NA	NA	T	ALONE	0
1	12	MZ	NA	NA	T	ALONE	0
2	12	MZ	NA	NA	T	ALONE	0
3	12	MZ	NA	NA	B	ALONE	1
4	12	MZ	NA	NA	B	ALONE	1
5	12	MZ	NA	NA	B	ALONE	1
6	12	MZ	NA	NA	T	ALONE	0
7	12	MZ	NA	NA	T	ALONE	0
8	12	MZ	NA	NA	T	ALONE	0
9	12	MZ	NA	NA	B	ALONE	1
10	12	MZ	NA	NA	B	ALONE	1
11	12	MZ	NA	NA	T	ALONE	0
12	12	MZ	NA	NA	T	ALONE	0
13	12	MZ	NA	NA	B	ALONE	1
14	12	MZ	NA	NA	T	ALONE	0
15	12	MZ	NA	NA	B	ALONE	1
16	12	MZ	NA	NA	T	ALONE	0
17	12	MZ	NA	NA	B	ALONE	1
18	12	MZ	NA	NA	B	ALONE	1
19	12	MZ	NA	NA	B	ALONE	1
20	12	MZ	NA	NA	T	ALONE	0
1	11	NY	NA	NA	T	ALONE	1
2	11	NY	NA	NA	B	ALONE	0
3	11	NY	NA	NA	T	ALONE	0
1	12	KK	NA	NA	T	ALONE	0
2	12	KK	NA	NA	B	ALONE	1
3	12	KK	NA	NA	B	ALONE	1
4	12	KK	NA	NA	T	ALONE	1
5	12	KK	NA	NA	T	ALONE	1
6	12	KK	NA	NA	B	ALONE	0
7	12	KK	NA	NA	T	ALONE	1
8	12	KK	NA	NA	B	ALONE	0
9	12	KK	NA	NA	B	ALONE	0
10	12	KK	NA	NA	T	ALONE	1
11	12	KK	NA	NA	T	ALONE	1
12	12	KK	NA	NA	B	ALONE	0
13	12	KK	NA	NA	T	ALONE	1
14	12	KK	NA	NA	B	ALONE	1
15	12	KK	NA	NA	B	ALONE	0
16	12	KK	NA	NA	T	ALONE	1
17	12	KK	NA	NA	T	ALONE	0
18	12	KK	NA	NA	B	ALONE	0
19	12	KK	NA	NA	B	ALONE	1
20	12	KK	NA	NA	T	ALONE	0

## Sheet: testfirst20vscontr
	condition	choice	amount	total	prop
BS	control	pros	8	19	0.421053
DJ	control	pros	11	20	0.55
HB	control	pros	10	19	0.526316
KG	control	pros	12	20	0.6
MZ	control	pros	10	20	0.5
NY	control	pros	1	3	0.333333
KK	control	pros	11	20	0.55
BS	test	pros	14	20	0.563107
DJ	test	pros	7	20	0.455556
HB	test	pros	10	20	0.525253
KG	test	pros	11	20	0.533898
MZ	test	pros	7	12	0.583333
NY	test	pros	9	20	0.45
KK	test	pros	11	20	0.545455

## Sheet: totalpulls
individual	pull	total	prop	type
Kikongo	38	350	0.108571429	test
Mokonzi	14	350	0.04	test
Djanoa	4	350	0.011428571	test
Habari	10	350	0.028571429	test
Nayoki	32	350	0.091428571	test
Kianga	5	350	0.014285714	test
Moko	1	350	0.002857143	test
Kikongo	0	175	0	control
Mokonzi	1	175	0.005714286	control
Djanoa	0	175	0	control
Habari	0	175	0	control
Nayoki	1	175	0.005714286	control
Kianga	0	175	0	control
Moko	0	175	0	control

## Sheet: ESM_DATA1_EXP_PCT
trial	session	actor	receiver	dyad	position	condition	pros
1	1	BS	DJ	BSDJ	B	PARTNER	1
1	6	BS	HB	BSHB	T	PARTNER	0
2	6	BS	HB	BSHB	B	PARTNER	0
3	6	BS	HB	BSHB	T	PARTNER	0
4	6	BS	HB	BSHB	T	PARTNER	0
5	6	BS	HB	BSHB	B	PARTNER	1
6	8	BS	HB	BSHB	T	PARTNER	1
7	8	BS	HB	BSHB	B	PARTNER	1
8	8	BS	HB	BSHB	B	PARTNER	0
9	8	BS	HB	BSHB	T	PARTNER	1
10	8	BS	HB	BSHB	T	PARTNER	0
11	8	BS	HB	BSHB	T	PARTNER	1
12	8	BS	HB	BSHB	B	PARTNER	1
13	8	BS	HB	BSHB	B	PARTNER	1
14	8	BS	HB	BSHB	B	PARTNER	1
15	8	BS	HB	BSHB	B	PARTNER	0
16	8	BS	HB	BSHB	T	PARTNER	0
17	8	BS	HB	BSHB	B	PARTNER	1
18	8	BS	HB	BSHB	T	PARTNER	1
19	8	BS	HB	BSHB	B	PARTNER	1
20	8	BS	HB	BSHB	B	PARTNER	1
1	4	BS	KG	BSKG	T	PARTNER	1
2	4	BS	KG	BSKG	B	PARTNER	0
3	4	BS	KG	BSKG	T	PARTNER	1
4	4	BS	KG	BSKG	B	PARTNER	1
5	4	BS	KG	BSKG	T	PARTNER	1
6	4	BS	KG	BSKG	T	PARTNER	1
7	4	BS	KG	BSKG	B	PARTNER	0
8	4	BS	KG	BSKG	B	PARTNER	1
9	4	BS	KG	BSKG	T	PARTNER	1
10	4	BS	KG	BSKG	B	PARTNER	0
11	4	BS	KG	BSKG	B	PARTNER	1
12	4	BS	KG	BSKG	T	PARTNER	1
13	4	BS	KG	BSKG	B	PARTNER	1
14	4	BS	KG	BSKG	T	PARTNER	1
1	8	BS	MZ	BSMZ	T	PARTNER	0
2	8	BS	MZ	BSMZ	B	PARTNER	0
3	8	BS	MZ	BSMZ	B	PARTNER	0
4	8	BS	MZ	BSMZ	T	PARTNER	0
1	1	BS	NY	BSNY	T	PARTNER	1
2	1	BS	NY	BSNY	B	PARTNER	0
3	1	BS	NY	BSNY	T	PARTNER	1
4	2	BS	NY	BSNY	T	PARTNER	0
5	3	BS	NY	BSNY	T	PARTNER	0
6	3	BS	NY	BSNY	T	PARTNER	1
7	3	BS	NY	BSNY	T	PARTNER	1
8	3	BS	NY	BSNY	T	PARTNER	0
9	3	BS	NY	BSNY	B	PARTNER	0
10	4	BS	NY	BSNY	T	PARTNER	1
11	4	BS	NY	BSNY	B	PARTNER	0
12	4	BS	NY	BSNY	T	PARTNER	0
13	4	BS	NY	BSNY	T	PARTNER	1
14	4	BS	NY	BSNY	B	PARTNER	1
15	4	BS	NY	BSNY	B	PARTNER	0
16	4	BS	NY	BSNY	B	PARTNER	0
17	4	BS	NY	BSNY	B	PARTNER	0
18	4	BS	NY	BSNY	B	PARTNER	1
19	4	BS	NY	BSNY	B	PARTNER	1
20	4	BS	NY	BSNY	T	PARTNER	0
1	1	BS	ZA	BSZA	T	PARTNER	1
2	9	BS	ZA	BSZA	T	PARTNER	0
3	9	BS	ZA	BSZA	B	PARTNER	1
4	9	BS	ZA	BSZA	B	PARTNER	1
5	9	BS	ZA	BSZA	T	PARTNER	0
6	9	BS	ZA	BSZA	B	PARTNER	1
7	9	BS	ZA	BSZA	B	PARTNER	1
8	9	BS	ZA	BSZA	B	PARTNER	1
9	10	BS	ZA	BSZA	T	PARTNER	0
1	4	BS	MO	BSMO	T	PARTNER	1
2	4	BS	MO	BSMO	T	PARTNER	1
3	4	BS	MO	BSMO	B	PARTNER	0
4	4	BS	MO	BSMO	B	PARTNER	0
5	4	BS	MO	BSMO	T	PARTNER	1
6	4	BS	MO	BSMO	T	PARTNER	1
7	4	BS	MO	BSMO	T	PARTNER	1
8	4	BS	MO	BSMO	T	PARTNER	0
9	4	BS	MO	BSMO	B	PARTNER	0
10	4	BS	MO	BSMO	T	PARTNER	1
11	4	BS	MO	BSMO	B	PARTNER	0
12	4	BS	MO	BSMO	B	PARTNER	0
13	4	BS	MO	BSMO	B	PARTNER	0
14	4	BS	MO	BSMO	T	PARTNER	0
15	4	BS	MO	BSMO	T	PARTNER	1
16	4	BS	MO	BSMO	B	PARTNER	0
17	4	BS	MO	BSMO	B	PARTNER	1
18	4	BS	MO	BSMO	B	PARTNER	0
1	3	BS	SZ	BSSZ	T	PARTNER	0
2	3	BS	SZ	BSSZ	B	PARTNER	1
3	3	BS	SZ	BSSZ	B	PARTNER	1
4	3	BS	SZ	BSSZ	T	PARTNER	1
5	3	BS	SZ	BSSZ	B	PARTNER	1
6	3	BS	SZ	BSSZ	T	PARTNER	1
7	3	BS	SZ	BSSZ	B	PARTNER	1
8	3	BS	SZ	BSSZ	T	PARTNER	1
9	6	BS	SZ	BSSZ	T	PARTNER	1
10	6	BS	SZ	BSSZ	B	PARTNER	0
11	8	BS	SZ	BSSZ	B	PARTNER	0
12	8	BS	SZ	BSSZ	T	PARTNER	1
13	8	BS	SZ	BSSZ	T	PARTNER	0
14	8	BS	SZ	BSSZ	B	PARTNER	1
15	8	BS	SZ	BSSZ	B	PARTNER	1
16	8	BS	SZ	BSSZ	T	PARTNER	0
17	8	BS	SZ	BSSZ	T	PARTNER	0
1	1	DJ	BS	BSDJ	B	PARTNER	1
2	5	DJ	BS	BSDJ	T	PARTNER	1
3	5	DJ	BS	BSDJ	T	PARTNER	0
4	7	DJ	BS	BSDJ	B	PARTNER	0
5	7	DJ	BS	BSDJ	B	PARTNER	0
6	7	DJ	BS	BSDJ	T	PARTNER	0
7	7	DJ	BS	BSDJ	T	PARTNER	0
8	7	DJ	BS	BSDJ	B	PARTNER	0
9	7	DJ	BS	BSDJ	B	PARTNER	1
10	7	DJ	BS	BSDJ	T	PARTNER	1
11	7	DJ	BS	BSDJ	B	PARTNER	1
12	7	DJ	BS	BSDJ	B	PARTNER	0
13	7	DJ	BS	BSDJ	T	PARTNER	0
1	1	DJ	HB	DJHB	T	PARTNER	0
2	1	DJ	HB	DJHB	T	PARTNER	0
3	1	DJ	HB	DJHB	T	PARTNER	0
4	1	DJ	HB	DJHB	B	PARTNER	1
5	1	DJ	HB	DJHB	B	PARTNER	1
6	1	DJ	HB	DJHB	T	PARTNER	0
7	1	DJ	HB	DJHB	T	PARTNER	0
8	1	DJ	HB	DJHB	B	PARTNER	1
9	1	DJ	HB	DJHB	B	PARTNER	1
10	1	DJ	HB	DJHB	B	PARTNER	1
11	1	DJ	HB	DJHB	T	PARTNER	0
12	1	DJ	HB	DJHB	B	PARTNER	1
13	1	DJ	HB	DJHB	T	PARTNER	0
14	1	DJ	HB	DJHB	B	PARTNER	1
15	1	DJ	HB	DJHB	B	PARTNER	1
16	1	DJ	HB	DJHB	T	PARTNER	0
17	1	DJ	HB	DJHB	T	PARTNER	0
18	1	DJ	HB	DJHB	B	PARTNER	1
19	1	DJ	HB	DJHB	B	PARTNER	1
20	1	DJ	HB	DJHB	T	PARTNER	0
1	7	DJ	HO	DJHO	T	PARTNER	0
2	7	DJ	HO	DJHO	B	PARTNER	0
3	8	DJ	HO	DJHO	T	PARTNER	0
4	8	DJ	HO	DJHO	B	PARTNER	1
1	1	DJ	KG	DJKG	B	PARTNER	0
2	1	DJ	KG	DJKG	T	PARTNER	1
3	1	DJ	KG	DJKG	B	PARTNER	1
4	1	DJ	KG	DJKG	T	PARTNER	1
5	1	DJ	KG	DJKG	T	PARTNER	1
6	1	DJ	KG	DJKG	B	PARTNER	1
7	1	DJ	KG	DJKG	T	PARTNER	0
8	1	DJ	KG	DJKG	T	PARTNER	0
9	1	DJ	KG	DJKG	B	PARTNER	1
10	1	DJ	KG	DJKG	T	PARTNER	0
11	1	DJ	KG	DJKG	B	PARTNER	1
12	1	DJ	KG	DJKG	T	PARTNER	0
13	1	DJ	KG	DJKG	T	PARTNER	0
14	1	DJ	KG	DJKG	B	PARTNER	1
15	1	DJ	KG	DJKG	B	PARTNER	1
16	1	DJ	KG	DJKG	T	PARTNER	0
17	1	DJ	KG	DJKG	T	PARTNER	0
18	1	DJ	KG	DJKG	B	PARTNER	1
19	1	DJ	KG	DJKG	B	PARTNER	1
20	1	DJ	KG	DJKG	B	PARTNER	1
1	5	DJ	MZ	DJMZ	B	PARTNER	1
2	5	DJ	MZ	DJMZ	T	PARTNER	0
3	5	DJ	MZ	DJMZ	T	PARTNER	0
4	5	DJ	MZ	DJMZ	B	PARTNER	0
1	1	DJ	NY	DJNY	T	PARTNER	1
2	1	DJ	NY	DJNY	T	PARTNER	0
3	1	DJ	NY	DJNY	B	PARTNER	1
4	1	DJ	NY	DJNY	B	PARTNER	1
5	1	DJ	NY	DJNY	T	PARTNER	0
6	1	DJ	NY	DJNY	B	PARTNER	1
7	1	DJ	NY	DJNY	T	PARTNER	0
8	1	DJ	NY	DJNY	B	PARTNER	1
9	1	DJ	NY	DJNY	T	PARTNER	0
10	1	DJ	NY	DJNY	T	PARTNER	0
11	1	DJ	NY	DJNY	B	PARTNER	1
12	1	DJ	NY	DJNY	B	PARTNER	1
13	1	DJ	NY	DJNY	B	PARTNER	1
14	1	DJ	NY	DJNY	T	PARTNER	0
15	1	DJ	NY	DJNY	T	PARTNER	0
16	1	DJ	NY	DJNY	B	PARTNER	1
17	1	DJ	NY	DJNY	B	PARTNER	1
18	1	DJ	NY	DJNY	T	PARTNER	0
19	1	DJ	NY	DJNY	B	PARTNER	1
20	2	DJ	NY	DJNY	B	PARTNER	1
1	8	DJ	KK	DJKK	T	PARTNER	1
2	8	DJ	KK	DJKK	B	PARTNER	0
3	8	DJ	KK	DJKK	B	PARTNER	0
4	9	DJ	KK	DJKK	T	PARTNER	1
5	9	DJ	KK	DJKK	B	PARTNER	1
1	1	DJ	SZ	DJSZ	T	PARTNER	1
2	1	DJ	SZ	DJSZ	B	PARTNER	0
3	7	DJ	SZ	DJSZ	T	PARTNER	0
1	5	DJ	BY	DJBY	T	PARTNER	1
1	3	HB	BS	BSHB	B	PARTNER	0
2	6	HB	BS	BSHB	T	PARTNER	1
3	7	HB	BS	BSHB	T	PARTNER	0
4	7	HB	BS	BSHB	B	PARTNER	1
5	7	HB	BS	BSHB	B	PARTNER	1
6	7	HB	BS	BSHB	T	PARTNER	0
7	7	HB	BS	BSHB	B	PARTNER	1
8	7	HB	BS	BSHB	T	PARTNER	0
1	2	HB	DJ	DJHB	T	PARTNER	0
2	2	HB	DJ	DJHB	B	PARTNER	1
3	2	HB	DJ	DJHB	T	PARTNER	1
4	2	HB	DJ	DJHB	T	PARTNER	0
5	2	HB	DJ	DJHB	B	PARTNER	1
6	2	HB	DJ	DJHB	B	PARTNER	1
7	2	HB	DJ	DJHB	T	PARTNER	0
8	2	HB	DJ	DJHB	B	PARTNER	0
9	2	HB	DJ	DJHB	T	PARTNER	0
10	2	HB	DJ	DJHB	B	PARTNER	1
11	2	HB	DJ	DJHB	T	PARTNER	0
12	2	HB	DJ	DJHB	B	PARTNER	1
13	2	HB	DJ	DJHB	T	PARTNER	0
14	2	HB	DJ	DJHB	B	PARTNER	0
15	2	HB	DJ	DJHB	B	PARTNER	1
16	2	HB	DJ	DJHB	T	PARTNER	0
17	2	HB	DJ	DJHB	B	PARTNER	1
18	2	HB	DJ	DJHB	T	PARTNER	0
19	2	HB	DJ	DJHB	B	PARTNER	1
20	3	HB	DJ	DJHB	T	PARTNER	1
1	7	HB	HO	HBHO	T	PARTNER	0
2	7	HB	HO	HBHO	B	PARTNER	1
3	7	HB	HO	HBHO	B	PARTNER	1
4	7	HB	HO	HBHO	T	PARTNER	1
5	7	HB	HO	HBHO	T	PARTNER	0
6	7	HB	HO	HBHO	B	PARTNER	1
7	7	HB	HO	HBHO	B	PARTNER	1
8	7	HB	HO	HBHO	T	PARTNER	0
9	7	HB	HO	HBHO	T	PARTNER	1
10	7	HB	HO	HBHO	B	PARTNER	1
11	7	HB	HO	HBHO	B	PARTNER	1
12	7	HB	HO	HBHO	T	PARTNER	0
13	7	HB	HO	HBHO	B	PARTNER	1
14	7	HB	HO	HBHO	B	PARTNER	1
15	7	HB	HO	HBHO	T	PARTNER	1
16	7	HB	HO	HBHO	T	PARTNER	0
17	7	HB	HO	HBHO	T	PARTNER	1
18	7	HB	HO	HBHO	B	PARTNER	1
19	7	HB	HO	HBHO	B	PARTNER	1
20	8	HB	HO	HBHO	T	PARTNER	0
1	2	HB	KG	HBKG	T	PARTNER	0
2	4	HB	KG	HBKG	T	PARTNER	0
1	2	HB	NY	HBNY	T	PARTNER	0
2	2	HB	NY	HBNY	T	PARTNER	0
3	2	HB	NY	HBNY	T	PARTNER	0
4	2	HB	NY	HBNY	B	PARTNER	1
5	2	HB	NY	HBNY	T	PARTNER	1
6	2	HB	NY	HBNY	T	PARTNER	0
7	2	HB	NY	HBNY	B	PARTNER	1
8	2	HB	NY	HBNY	T	PARTNER	1
9	2	HB	NY	HBNY	T	PARTNER	0
10	2	HB	NY	HBNY	B	PARTNER	1
11	2	HB	NY	HBNY	T	PARTNER	1
12	2	HB	NY	HBNY	T	PARTNER	0
13	2	HB	NY	HBNY	B	PARTNER	1
14	2	HB	NY	HBNY	T	PARTNER	0
15	2	HB	NY	HBNY	B	PARTNER	1
16	2	HB	NY	HBNY	T	PARTNER	0
17	2	HB	NY	HBNY	B	PARTNER	1
18	2	HB	NY	HBNY	B	PARTNER	1
19	8	HB	NY	HBNY	T	PARTNER	0
20	8	HB	NY	HBNY	T	PARTNER	0
1	9	HB	ZA	HBZA	T	PARTNER	1
1	3	HB	KK	HBKK	T	PARTNER	1
2	3	HB	KK	HBKK	B	PARTNER	0
3	3	HB	KK	HBKK	B	PARTNER	1
4	3	HB	KK	HBKK	T	PARTNER	1
5	3	HB	KK	HBKK	T	PARTNER	0
6	3	HB	KK	HBKK	B	PARTNER	0
7	3	HB	KK	HBKK	T	PARTNER	0
8	3	HB	KK	HBKK	T	PARTNER	0
9	3	HB	KK	HBKK	T	PARTNER	0
10	3	HB	KK	HBKK	B	PARTNER	0
11	3	HB	KK	HBKK	T	PARTNER	1
12	3	HB	KK	HBKK	T	PARTNER	0
13	3	HB	KK	HBKK	B	PARTNER	1
14	4	HB	KK	HBKK	T	PARTNER	0
15	4	HB	KK	HBKK	T	PARTNER	0
16	4	HB	KK	HBKK	B	PARTNER	1
17	4	HB	KK	HBKK	T	PARTNER	0
1	2	HB	MO	HBMO	B	PARTNER	1
2	3	HB	MO	HBMO	T	PARTNER	1
3	3	HB	MO	HBMO	T	PARTNER	1
4	3	HB	MO	HBMO	T	PARTNER	0
5	3	HB	MO	HBMO	B	PARTNER	1
6	3	HB	MO	HBMO	T	PARTNER	0
7	3	HB	MO	HBMO	B	PARTNER	1
8	4	HB	MO	HBMO	B	PARTNER	1
9	7	HB	MO	HBMO	T	PARTNER	0
1	3	HB	SZ	HBSZ	T	PARTNER	0
2	8	HB	SZ	HBSZ	B	PARTNER	1
1	3	KG	BS	BSKG	T	PARTNER	1
2	3	KG	BS	BSKG	T	PARTNER	0
3	3	KG	BS	BSKG	T	PARTNER	1
4	3	KG	BS	BSKG	T	PARTNER	1
5	3	KG	BS	BSKG	B	PARTNER	1
6	3	KG	BS	BSKG	T	PARTNER	1
7	3	KG	BS	BSKG	B	PARTNER	1
8	3	KG	BS	BSKG	T	PARTNER	0
9	3	KG	BS	BSKG	B	PARTNER	0
10	3	KG	BS	BSKG	T	PARTNER	0
11	3	KG	BS	BSKG	B	PARTNER	1
12	3	KG	BS	BSKG	T	PARTNER	1
13	3	KG	BS	BSKG	B	PARTNER	0
14	3	KG	BS	BSKG	B	PARTNER	0
15	3	KG	BS	BSKG	T	PARTNER	1
16	3	KG	BS	BSKG	B	PARTNER	0
17	3	KG	BS	BSKG	B	PARTNER	0
18	3	KG	BS	BSKG	T	PARTNER	1
19	3	KG	BS	BSKG	B	PARTNER	0
20	3	KG	BS	BSKG	T	PARTNER	1
1	1	KG	DJ	DJKG	B	PARTNER	0
2	2	KG	DJ	DJKG	T	PARTNER	1
3	2	KG	DJ	DJKG	T	PARTNER	0
4	2	KG	DJ	DJKG	T	PARTNER	0
5	2	KG	DJ	DJKG	B	PARTNER	1
6	2	KG	DJ	DJKG	B	PARTNER	1
7	2	KG	DJ	DJKG	T	PARTNER	0
8	2	KG	DJ	DJKG	B	PARTNER	1
9	2	KG	DJ	DJKG	T	PARTNER	0
10	2	KG	DJ	DJKG	B	PARTNER	1
11	2	KG	DJ	DJKG	B	PARTNER	1
12	2	KG	DJ	DJKG	B	PARTNER	0
13	2	KG	DJ	DJKG	T	PARTNER	1
14	2	KG	DJ	DJKG	B	PARTNER	0
15	2	KG	DJ	DJKG	B	PARTNER	0
16	2	KG	DJ	DJKG	T	PARTNER	1
17	2	KG	DJ	DJKG	T	PARTNER	1
18	2	KG	DJ	DJKG	B	PARTNER	1
19	2	KG	DJ	DJKG	B	PARTNER	1
20	2	KG	DJ	DJKG	T	PARTNER	0
1	3	KG	HB	HBKG	T	PARTNER	1
2	3	KG	HB	HBKG	B	PARTNER	0
3	3	KG	HB	HBKG	B	PARTNER	0
4	3	KG	HB	HBKG	T	PARTNER	1
5	3	KG	HB	HBKG	T	PARTNER	1
6	3	KG	HB	HBKG	B	PARTNER	0
7	3	KG	HB	HBKG	T	PARTNER	1
8	4	KG	HB	HBKG	T	PARTNER	0
9	4	KG	HB	HBKG	B	PARTNER	1
10	4	KG	HB	HBKG	T	PARTNER	0
11	4	KG	HB	HBKG	T	PARTNER	0
12	4	KG	HB	HBKG	B	PARTNER	1
13	4	KG	HB	HBKG	T	PARTNER	1
14	4	KG	HB	HBKG	B	PARTNER	1
15	4	KG	HB	HBKG	B	PARTNER	0
16	4	KG	HB	HBKG	T	PARTNER	0
17	4	KG	HB	HBKG	T	PARTNER	0
18	4	KG	HB	HBKG	B	PARTNER	0
19	4	KG	HB	HBKG	B	PARTNER	0
20	5	KG	HB	HBKG	B	PARTNER	1
1	2	KG	MZ	KGMZ	T	PARTNER	0
2	2	KG	MZ	KGMZ	B	PARTNER	1
3	6	KG	MZ	KGMZ	T	PARTNER	0
4	6	KG	MZ	KGMZ	B	PARTNER	0
1	1	KG	NY	KGNY	T	PARTNER	1
2	1	KG	NY	KGNY	B	PARTNER	1
3	3	KG	NY	KGNY	T	PARTNER	1
4	3	KG	NY	KGNY	B	PARTNER	0
5	3	KG	NY	KGNY	B	PARTNER	0
6	3	KG	NY	KGNY	T	PARTNER	1
7	5	KG	NY	KGNY	T	PARTNER	1
8	5	KG	NY	KGNY	B	PARTNER	1
9	5	KG	NY	KGNY	T	PARTNER	0
10	5	KG	NY	KGNY	B	PARTNER	0
11	9	KG	NY	KGNY	T	PARTNER	0
12	9	KG	NY	KGNY	B	PARTNER	0
13	9	KG	NY	KGNY	B	PARTNER	1
14	9	KG	NY	KGNY	B	PARTNER	1
15	9	KG	NY	KGNY	T	PARTNER	1
16	9	KG	NY	KGNY	T	PARTNER	1
17	9	KG	NY	KGNY	T	PARTNER	1
18	9	KG	NY	KGNY	B	PARTNER	0
19	9	KG	NY	KGNY	B	PARTNER	1
1	5	KG	ZA	KGZA	T	PARTNER	1
1	3	KG	KK	KGKK	T	PARTNER	1
2	3	KG	KK	KGKK	B	PARTNER	1
3	5	KG	KK	KGKK	B	PARTNER	1
4	5	KG	KK	KGKK	T	PARTNER	0
5	5	KG	KK	KGKK	T	PARTNER	0
6	6	KG	KK	KGKK	T	PARTNER	0
7	6	KG	KK	KGKK	B	PARTNER	1
8	6	KG	KK	KGKK	T	PARTNER	0
9	6	KG	KK	KGKK	B	PARTNER	1
10	6	KG	KK	KGKK	T	PARTNER	1
11	6	KG	KK	KGKK	B	PARTNER	1
12	6	KG	KK	KGKK	T	PARTNER	1
13	9	KG	KK	KGKK	T	PARTNER	1
14	9	KG	KK	KGKK	B	PARTNER	0
15	9	KG	KK	KGKK	T	PARTNER	1
16	9	KG	KK	KGKK	B	PARTNER	0
1	3	KG	MO	KGMO	T	PARTNER	0
2	4	KG	MO	KGMO	T	PARTNER	1
3	4	KG	MO	KGMO	B	PARTNER	0
4	4	KG	MO	KGMO	T	PARTNER	1
5	5	KG	MO	KGMO	T	PARTNER	0
6	5	KG	MO	KGMO	B	PARTNER	0
7	5	KG	MO	KGMO	T	PARTNER	0
8	5	KG	MO	KGMO	T	PARTNER	1
9	6	KG	MO	KGMO	T	PARTNER	0
10	6	KG	MO	KGMO	B	PARTNER	1
11	6	KG	MO	KGMO	B	PARTNER	1
12	8	KG	MO	KGMO	T	PARTNER	0
13	9	KG	MO	KGMO	T	PARTNER	1
14	9	KG	MO	KGMO	T	PARTNER	1
15	9	KG	MO	KGMO	B	PARTNER	0
16	9	KG	MO	KGMO	B	PARTNER	1
17	9	KG	MO	KGMO	B	PARTNER	0
18	9	KG	MO	KGMO	B	PARTNER	0
1	2	MZ	NY	MZNY	T	PARTNER	1
2	2	MZ	NY	MZNY	B	PARTNER	1
1	1	MZ	ZA	MZZA	T	PARTNER	0
2	7	MZ	ZA	MZZA	T	PARTNER	1
1	4	MZ	KK	KKMZ	T	PARTNER	0
2	4	MZ	KK	KKMZ	B	PARTNER	0
3	10	MZ	KK	KKMZ	T	PARTNER	0
4	10	MZ	KK	KKMZ	T	PARTNER	1
5	10	MZ	KK	KKMZ	B	PARTNER	1
6	10	MZ	KK	KKMZ	T	PARTNER	0
7	10	MZ	KK	KKMZ	B	PARTNER	1
8	10	MZ	KK	KKMZ	B	PARTNER	1
1	5	NY	BS	BSNY	T	PARTNER	0
1	2	NY	DJ	DJNY	T	PARTNER	0
2	2	NY	DJ	DJNY	T	PARTNER	0
3	2	NY	DJ	DJNY	T	PARTNER	0
4	2	NY	DJ	DJNY	B	PARTNER	1
5	2	NY	DJ	DJNY	T	PARTNER	0
1	2	NY	HB	HBNY	B	PARTNER	0
2	8	NY	HB	HBNY	B	PARTNER	1
1	8	NY	HO	HONY	T	PARTNER	0
1	2	NY	MZ	MZNY	T	PARTNER	1
2	8	NY	MZ	MZNY	T	PARTNER	0
3	10	NY	MZ	MZNY	T	PARTNER	1
1	5	NY	ZA	NYZA	B	PARTNER	1
2	5	NY	ZA	NYZA	T	PARTNER	1
3	5	NY	ZA	NYZA	T	PARTNER	0
4	5	NY	ZA	NYZA	T	PARTNER	0
5	5	NY	ZA	NYZA	B	PARTNER	1
6	5	NY	ZA	NYZA	B	PARTNER	1
7	5	NY	ZA	NYZA	T	PARTNER	0
8	5	NY	ZA	NYZA	B	PARTNER	1
9	5	NY	ZA	NYZA	B	PARTNER	1
10	5	NY	ZA	NYZA	T	PARTNER	0
11	6	NY	ZA	NYZA	T	PARTNER	0
12	6	NY	ZA	NYZA	T	PARTNER	0
13	6	NY	ZA	NYZA	B	PARTNER	1
14	6	NY	ZA	NYZA	B	PARTNER	1
15	8	NY	ZA	NYZA	T	PARTNER	0
16	10	NY	ZA	NYZA	T	PARTNER	0
17	10	NY	ZA	NYZA	B	PARTNER	1
18	10	NY	ZA	NYZA	T	PARTNER	1
1	1	NY	KK	KKNY	T	PARTNER	0
2	1	NY	KK	KKNY	T	PARTNER	0
3	2	NY	KK	KKNY	B	PARTNER	1
4	3	NY	KK	KKNY	T	PARTNER	1
5	5	NY	KK	KKNY	T	PARTNER	0
6	5	NY	KK	KKNY	B	PARTNER	1
7	6	NY	KK	KKNY	T	PARTNER	1
8	6	NY	KK	KKNY	B	PARTNER	1
9	6	NY	KK	KKNY	B	PARTNER	1
10	6	NY	KK	KKNY	B	PARTNER	0
11	6	NY	KK	KKNY	B	PARTNER	1
12	6	NY	KK	KKNY	B	PARTNER	1
13	6	NY	KK	KKNY	B	PARTNER	1
14	6	NY	KK	KKNY	T	PARTNER	0
15	6	NY	KK	KKNY	T	PARTNER	0
16	6	NY	KK	KKNY	T	PARTNER	0
17	6	NY	KK	KKNY	B	PARTNER	1
18	6	NY	KK	KKNY	T	PARTNER	0
19	6	NY	KK	KKNY	B	PARTNER	1
20	8	NY	KK	KKNY	B	PARTNER	1
1	4	KK	HO	HOKK	T	PARTNER	1
2	4	KK	HO	HOKK	B	PARTNER	0
3	4	KK	HO	HOKK	T	PARTNER	1
1	1	KK	NY	KKNY	B	PARTNER	0
2	2	KK	NY	KKNY	T	PARTNER	1
3	2	KK	NY	KKNY	T	PARTNER	0
4	3	KK	NY	KKNY	T	PARTNER	1
5	3	KK	NY	KKNY	B	PARTNER	0
6	3	KK	NY	KKNY	B	PARTNER	0
7	3	KK	NY	KKNY	T	PARTNER	1
8	4	KK	NY	KKNY	T	PARTNER	1
9	9	KK	NY	KKNY	T	PARTNER	1
10	10	KK	NY	KKNY	T	PARTNER	1
11	10	KK	NY	KKNY	B	PARTNER	0
1	2	KK	VI	KKVI	B	PARTNER	0
2	2	KK	VI	KKVI	T	PARTNER	1
3	2	KK	VI	KKVI	B	PARTNER	1
4	2	KK	VI	KKVI	T	PARTNER	0
5	2	KK	VI	KKVI	T	PARTNER	0
1	8	KK	ZA	KKZA	T	PARTNER	1
2	9	KK	ZA	KKZA	T	PARTNER	1
1	3	KK	MO	KKMO	B	PARTNER	0
1	C	BS	NA	NA	T	ALONE	1
2	C	BS	NA	NA	T	ALONE	0
3	C	BS	NA	NA	B	ALONE	1
4	C	BS	NA	NA	B	ALONE	1
5	C	BS	NA	NA	T	ALONE	0
6	C	BS	NA	NA	T	ALONE	0
7	C	BS	NA	NA	T	ALONE	0
8	C	BS	NA	NA	B	ALONE	0
9	C	BS	NA	NA	B	ALONE	1
10	C	BS	NA	NA	B	ALONE	0
11	C	BS	NA	NA	B	ALONE	1
12	C	BS	NA	NA	T	ALONE	0
13	C	BS	NA	NA	T	ALONE	0
14	C	BS	NA	NA	B	ALONE	1
15	C	BS	NA	NA	T	ALONE	0
16	C	BS	NA	NA	T	ALONE	0
17	C	BS	NA	NA	B	ALONE	1
18	C	BS	NA	NA	B	ALONE	1
19	C	BS	NA	NA	T	ALONE	0
1	C	DJ	NA	NA	B	ALONE	1
2	C	DJ	NA	NA	T	ALONE	0
3	C	DJ	NA	NA	T	ALONE	1
4	C	DJ	NA	NA	B	ALONE	1
5	C	DJ	NA	NA	T	ALONE	1
6	C	DJ	NA	NA	B	ALONE	0
7	C	DJ	NA	NA	B	ALONE	1
8	C	DJ	NA	NA	T	ALONE	0
9	C	DJ	NA	NA	T	ALONE	0
10	C	DJ	NA	NA	B	ALONE	1
11	C	DJ	NA	NA	B	ALONE	1
12	C	DJ	NA	NA	T	ALONE	0
13	C	DJ	NA	NA	T	ALONE	0
14	C	DJ	NA	NA	B	ALONE	1
15	C	DJ	NA	NA	B	ALONE	1
16	C	DJ	NA	NA	T	ALONE	0
17	C	DJ	NA	NA	B	ALONE	1
18	C	DJ	NA	NA	T	ALONE	0
19	C	DJ	NA	NA	T	ALONE	0
20	C	DJ	NA	NA	B	ALONE	1
1	C	HB	NA	NA	T	ALONE	0
2	C	HB	NA	NA	T	ALONE	0
3	C	HB	NA	NA	T	ALONE	0
4	C	HB	NA	NA	T	ALONE	0
5	C	HB	NA	NA	T	ALONE	1
6	C	HB	NA	NA	T	ALONE	0
7	C	HB	NA	NA	T	ALONE	0
8	C	HB	NA	NA	T	ALONE	0
9	C	HB	NA	NA	B	ALONE	1
10	C	HB	NA	NA	B	ALONE	1
11	C	HB	NA	NA	B	ALONE	1
12	C	HB	NA	NA	B	ALONE	1
13	C	HB	NA	NA	B	ALONE	1
14	C	HB	NA	NA	T	ALONE	0
15	C	HB	NA	NA	B	ALONE	1
16	C	HB	NA	NA	B	ALONE	1
17	C	HB	NA	NA	T	ALONE	0
18	C	HB	NA	NA	B	ALONE	1
19	C	HB	NA	NA	T	ALONE	0
20	C	HB	NA	NA	B	ALONE	1
1	C	KG	NA	NA	T	ALONE	1
2	C	KG	NA	NA	T	ALONE	1
3	C	KG	NA	NA	T	ALONE	0
4	C	KG	NA	NA	T	ALONE	1
5	C	KG	NA	NA	B	ALONE	1
6	C	KG	NA	NA	B	ALONE	1
7	C	KG	NA	NA	B	ALONE	0
8	C	KG	NA	NA	B	ALONE	0
9	C	KG	NA	NA	B	ALONE	1
10	C	KG	NA	NA	T	ALONE	0
11	C	KG	NA	NA	T	ALONE	0
12	C	KG	NA	NA	B	ALONE	0
13	C	KG	NA	NA	T	ALONE	0
14	C	KG	NA	NA	T	ALONE	1
15	C	KG	NA	NA	B	ALONE	1
16	C	KG	NA	NA	B	ALONE	1
17	C	KG	NA	NA	B	ALONE	1
18	C	KG	NA	NA	T	ALONE	1
19	C	KG	NA	NA	B	ALONE	1
20	C	KG	NA	NA	T	ALONE	0
1	C	MZ	NA	NA	T	ALONE	0
2	C	MZ	NA	NA	T	ALONE	0
3	C	MZ	NA	NA	B	ALONE	1
4	C	MZ	NA	NA	B	ALONE	1
5	C	MZ	NA	NA	B	ALONE	1
6	C	MZ	NA	NA	T	ALONE	0
7	C	MZ	NA	NA	T	ALONE	0
8	C	MZ	NA	NA	T	ALONE	0
9	C	MZ	NA	NA	B	ALONE	1
10	C	MZ	NA	NA	B	ALONE	1
11	C	MZ	NA	NA	T	ALONE	0
12	C	MZ	NA	NA	T	ALONE	0
13	C	MZ	NA	NA	B	ALONE	1
14	C	MZ	NA	NA	T	ALONE	0
15	C	MZ	NA	NA	B	ALONE	1
16	C	MZ	NA	NA	T	ALONE	0
17	C	MZ	NA	NA	B	ALONE	1
18	C	MZ	NA	NA	B	ALONE	1
19	C	MZ	NA	NA	B	ALONE	1
20	C	MZ	NA	NA	T	ALONE	0
1	C	NY	NA	NA	T	ALONE	1
2	C	NY	NA	NA	B	ALONE	0
3	C	NY	NA	NA	T	ALONE	0
1	C	KK	NA	NA	T	ALONE	0
2	C	KK	NA	NA	B	ALONE	1
3	C	KK	NA	NA	B	ALONE	1
4	C	KK	NA	NA	T	ALONE	1
5	C	KK	NA	NA	T	ALONE	1
6	C	KK	NA	NA	B	ALONE	0
7	C	KK	NA	NA	T	ALONE	1
8	C	KK	NA	NA	B	ALONE	0
9	C	KK	NA	NA	B	ALONE	0
10	C	KK	NA	NA	T	ALONE	1
11	C	KK	NA	NA	T	ALONE	1
12	C	KK	NA	NA	B	ALONE	0
13	C	KK	NA	NA	T	ALONE	1
14	C	KK	NA	NA	B	ALONE	1
15	C	KK	NA	NA	B	ALONE	0
16	C	KK	NA	NA	T	ALONE	1
17	C	KK	NA	NA	T	ALONE	0
18	C	KK	NA	NA	B	ALONE	0
19	C	KK	NA	NA	B	ALONE	1
20	C	KK	NA	NA	T	ALONE	0

## Sheet: ESM_Data2_Exp_GSP
	Subject	Amount of pulls	Condition (test or control)	Session number	Condition.2 (test or control)	Succesful deliveries	Grapes taken during motivational trials	Total possible motivational trials per session
	Hortense	0	t1	1	t	0	0	14
	Vifijo	0	t1	1	t	0	0
	Zamba	0	t1	1	t	0	0
	Kikongo	2	t1	1	t	0	0
	Mokonzi	6	t1	1	t	0	0
	Djanoa	1	t1	1	t	0	6
	Habari	2	t1	1	t	0	0
	Nayoki	0	t1	1	t	0	0
	Busira	0	t1	1	t	0	0
	Kianga	3	t1	1	t	0	8
	Hortense	0	c1	1	c	NA	0	7
	Vifijo	0	c1	1	c	NA	0
	Zamba	0	c1	1	c	NA	0
	Kikongo	0	c1	1	c	NA	0
	Mokonzi	0	c1	1	c	NA	0
	Djanoa	0	c1	1	c	NA	7
	Habari	0	c1	1	c	NA	0
	Nayoki	0	c1	1	c	NA	0
	Busira	0	c1	1	c	NA	0
	Kianga	0	c1	1	c	NA	0
	Hortense	0	t2	2	t	0	0	14
	Vifijo	0	t2	2	t	0	0
	Zamba	0	t2	2	t	0	0
	Kikongo	15	t2	2	t	2	0
	Mokonzi	3	t2	2	t	0	0
	Djanoa	0	t2	2	t	0	13
	Habari	3	t2	2	t	0	0
	Nayoki	15	t2	2	t	0	0
	Busira	0	t2	2	t	0	0
	Kianga	1	t2	2	t	0	1
	Hortense	0	c2	2	c	NA	0	7
	Vifijo	0	c2	2	c	NA	0
	Zamba	0	c2	2	c	NA	0
	Kikongo	0	c2	2	c	NA	0
	Mokonzi	0	c2	2	c	NA	0
	Djanoa	0	c2	2	c	NA	7
	Habari	0	c2	2	c	NA	0
	Nayoki	0	c2	2	c	NA	0
	Busira	0	c2	2	c	NA	0
	Kianga	0	c2	2	c	NA	0
	Hortense	0	t3	3	t	0	0	14
	Vifijo	0	t3	3	t	0	0
	Zamba	0	t3	3	t	0	0
	Kikongo	15	t3	3	t	3	0
	Mokonzi	2	t3	3	t	0	0
	Djanoa	0	t3	3	t	0	13
	Habari	3	t3	3	t	0	0
	Nayoki	14	t3	3	t	0	0
	Busira	0	t3	3	t	0	0
	Kianga	1	t3	3	t	0	1
	Hortense	0	c3	3	c	NA	0	7
	Vifijo	0	c3	3	c	NA	0
	Zamba	0	c3	3	c	NA	0
	Kikongo	0	c3	3	c	NA	0
	Mokonzi	0	c3	3	c	NA	0
	Djanoa	0	c3	3	c	NA	7
	Habari	0	c3	3	c	NA	0
	Nayoki	0	c3	3	c	NA	0
	Busira	0	c3	3	c	NA	0
	Kianga	0	c3	3	c	NA	0
	Hortense	0	t4	4	t	0	0	13
	Vifijo	0	t4	4	t	0	0
	Zamba	0	t4	4	t	0	0
	Kikongo	3	t4	4	t	0	0
	Mokonzi	3	t4	4	t	1	0
	Djanoa	3	t4	4	t	0	13
	Habari	1	t4	4	t	0	0
	Nayoki	2	t4	4	t	1	0
	Busira	0	t4	4	t	0	0
	Kianga	0	t4	4	t	0	0
	Hortense	0	c4	4	c	NA	0	6
	Vifijo	0	c4	4	c	NA	0
	Zamba	0	c4	4	c	NA	0
	Kikongo	0	c4	4	c	NA	0
	Mokonzi	1	c4	4	c	NA	0
	Djanoa	0	c4	4	c	NA	6
	Habari	0	c4	4	c	NA	0
	Nayoki	0	c4	4	c	NA	0
	Busira	0	c4	4	c	NA	0
	Kianga	0	c4	4	c	NA	0
	Hortense	0	t5	5	t	0	0	14
	Vifijo	0	t5	5	t	0	0
	Zamba	0	t5	5	t	0	0
	Kikongo	3	t5	5	t	0	0
	Mokonzi	0	t5	5	t	0	0
	Djanoa	0	t5	5	t	0	1
	Habari	1	t5	5	t	0	0
	Nayoki	1	t5	5	t	1	0
	Busira	0	t5	5	t	0	0
	Kianga	0	t5	5	t	0	13
	Hortense	0	c5	5	c	NA	0	7
	Vifijo	0	c5	5	c	NA	0
	Zamba	0	c5	5	c	NA	0
	Kikongo	0	c5	5	c	NA	0
	Mokonzi	0	c5	5	c	NA	0
	Djanoa	0	c5	5	c	NA	6
	Habari	0	c5	5	c	NA	0
	Nayoki	1	c5	5	c	NA	0
	Busira	0	c5	5	c	NA	0
	Kianga	0	c5	5	c	NA	1

## Sheet: ESM_Data2_Exp_GSP (2)
	Subject	Amount of pulls	Condition (test or control)	Session number	Condition.2 (test or control)	Succesful deliveries	Receiver1	Receiver2	Receiver3
	Kikongo	15	t2	2	t	2	Habari	Nayoki
	Kikongo	15	t3	3	t	3	Habari	Nayoki	Nayoki
	Mokonzi	3	t4	4	t	1	Djanoa
	Nayoki	2	t4	4	t	1	Djanoa
	Nayoki	1	t5	5	t	1	Moko
